# Supplementary material for: The Predictive Value of Risk Factors and Prognostic Scores in Hospitalized COVID-19 Patients
Source: MDPI journal article supplement (doi:10.3390/diagnostics13162653), 2023-08-11
Supplement: s1 [file s1]

# MEWS

| SYSTOLIC BP  |        | HEART RATE |        | RESPIRATORY RATE |        | TEMPERATURE            |        | APVU SCORE      |        |
|--------------|--------|------------|--------|------------------|--------|------------------------|--------|-----------------|--------|
| ≤70 mmHg     | +<br>3 | <40 bpm    | +<br>2 | <9 bpm           | +<br>2 | <35°C / 95°F           | +<br>2 | Alert           | 0      |
| 71-80 mmHg   | +<br>2 | 41-50bpm   | +<br>1 | 9-14 bpm         | 0      | 35–38.4°C / 95–101.1°F | 0      | Reacts to voice | +<br>1 |
| 81-100mm Hg  | +<br>1 | 51-100bpm  | 0      | 15-20bpm         | +<br>1 | ≥38.5°C / 101.3°F      | +<br>2 | Reacts to pain  | +<br>2 |
| 101-199m mHg | 0      | 101-110bpm | +<br>1 | 21-29bpm         | +<br>2 |                        |        | Unresponsive    | +<br>3 |
| ≥200 mmHg    | +<br>2 | 111-129bpm | +<br>2 | ≥30 bpm          | +<br>3 |                        |        |                 |        |
|              |        | ≥130 bpm   | +<br>3 |                  |        |                        |        |                 |        |

- A score ≥5 is statistically linked to increased likelihood of death or admission to an intensive care unit.
- For any single physiological parameter scored +3, consider higher level of care for patient.

# NEWS

| SYSTOLIC BP  |    | HEART RATE  |    | RESPIRATORY RATE |    | TEMPERATURE               |    | APVU SCORE                 |    | SaO2    | SUPPLEMENT. O2 |     |    |
|--------------|----|-------------|----|------------------|----|---------------------------|----|----------------------------|----|---------|----------------|-----|----|
| ≤90 mmHg     | +3 | <40 bpm     | +3 | <8 bpm           | +3 | ≤35°C / 95°F              | +3 | Alert                      | 0  | ≤91 %   | +3             | YES | +2 |
| 91-100 mmHg  | +2 | 41-50 bpm   | +1 | 9-11 bpm         | +1 | 35.1-36°C / 95.1-96.8°F   | +1 | Voice Pain<br>Unresponsive | +3 | 92-93 % | +2             | NO  | 0  |
| 101-110 mmHg | +1 | 51-90 bpm   | 0  | 12-20 bpm        | 0  | 36.1-38°C / 96.9-100.4°F  | 0  |                            |    | 94-95 % | +1             |     |    |
| 111-219 mmHg | 0  | 91-110 bpm  | +1 | 21-24 bpm        | +2 | 38.1-39°C / 100.5-102.2°F | +1 |                            |    | ≥96 %   | 0              |     |    |
| ≥220 mmHg    | +3 | 111-130 bpm | +2 | ≥25 bpm          | +3 | ≥39.1 °C / 102.3°F        | +2 |                            |    |         |                |     |    |
|              |    | ≥131 bpm    | +3 |                  |    |                           |    |                            |    |         |                |     |    |

- A low score (NEWS 1–4) should prompt assessment by a competent registered nurse who should decide if a change to frequency of clinical monitoring or an escalation of clinical care is required.
- A medium score (ie NEWS of 5–6 or a RED score) should prompt an urgent review by a clinician skilled with competencies in the assessment of acute illness – usually a ward-based doctor or acute team nurse, who should consider whether escalation of care to a team with critical-care skills is required (ie critical care outreach team). A RED score refers to an extreme variation in a single physiological parameter (i.e., a score of 3 on the NEWS chart in any one physiological parameter, colored RED to aid identification; e.g., heart rate
- A high score (NEWS ≥7) should prompt emergency assessment by a clinical team/ critical care outreach team with critical-care competencies and usually transfer of the patient to a higher dependency care area.

# NEWS2

| SYSTOLIC BP  |    | HEART RATE  |    | RESPIRATORY RATE |    | TEMPERATURE               |    | APVU SCORE              |    | HYPERCAPNIC RESP. FAILURE |    |                                       | SUPPLEMENT. O2 |     |    |
|--------------|----|-------------|----|------------------|----|---------------------------|----|-------------------------|----|---------------------------|----|---------------------------------------|----------------|-----|----|
| ≤90 mmHg     | +3 | <40 bpm     | +3 | <8 bpm           | +3 | ≤35°C / 95°F              | +3 | Alert                   | 0  | NO                        |    | YES                                   |                | YES | +2 |
| 91-100 mmHg  | +2 | 41-50 bpm   | +1 | 9-11 bpm         | +1 | 35.1-36°C / 95.1-96.8°F   | +1 | Voice Pain Unresponsive | +3 | ≤91%                      | +3 | ≤83%                                  | +3             | NO  | 0  |
| 101-110 mmHg | +1 | 51-90 bpm   | 0  | 12-20 bpm        | 0  | 36.1-38°C / 96.9-100.4°F  | 0  |                         |    | 92-93%                    | +2 | 84-85%                                | +2             |     |    |
| 111-219 mmHg | 0  | 91-110 bpm  | +1 | 21-24 bpm        | +2 | 38.1-39°C / 100.5-102.2°F | +1 |                         |    | 94-95%                    | +1 | 86-87%                                | +1             |     |    |
| ≥220 mmHg    | +3 | 111-130 bpm | +2 | ≥25 bpm          | +3 | ≥39.1 °C / 102.3°F        | +2 |                         |    | ≥96%                      | 0  | 88-92%, ≥93% on room air              | 0              |     |    |
|              |    | ≥131 bpm    | +3 |                  |    |                           |    |                         |    |                           |    | 93-94% on supplemental O <sub>2</sub> | +1             |     |    |
|              |    |             |    |                  |    |                           |    |                         |    |                           |    | 95-96% on supplemental O <sub>2</sub> | +2             |     |    |
|              |    |             |    |                  |    |                           |    |                         |    |                           |    | ≥97% on supplemental O <sub>2</sub>   | +3             |     |    |

- Score 0-4: Clinical Risk Low, Frequency of monitoring every 12 hours if score is 0 and every 6 hours if score is 1-4. (Assessment by a competent registered nurse or equivalent, to decide change in frequency of clinical monitoring or escalation of care)
- Score of 3 in any individual parameter: Low-medium clinical risk; monitoring every hour; (Urgent review by a ward-based doctor, to decide change in frequency of clinical monitoring or escalation of care)
- Score 5-6: Medium clinical risk; monitoring every hour minimum; (Urgent review by a ward-based doctor or acute team nurse, to decide if critical care team assessment is needed)

- Score  $\geq 7$ : High clinical risk; Continuous monitoring of vital signs; (Emergent assessment by a clinical team or critical care team and usually transfer to higher level of care)

# REMS

| AGE   |        | MAP         |        | HEART RATE |        | RESPIRATORY RATE |        | SaO2   |        | GCS   |        |
|-------|--------|-------------|--------|------------|--------|------------------|--------|--------|--------|-------|--------|
| <45   | 0      | >159mmHg    | +<br>4 | >179bpm    | +<br>4 | 49bpm            | +<br>4 | <75%   | +<br>4 | <5    | +<br>4 |
| 45-54 | +<br>2 | 130-159mmHg | +<br>3 | 140-179bpm | +<br>3 | 35-49bpm         | +<br>3 | 75-85% | +<br>3 | 5-7   | +<br>3 |
| 55-64 | +<br>3 | 110-129mmHg | +<br>2 | 110-139bpm | +<br>2 | 25-34bpm         | +<br>1 | 86-89% | +<br>1 | 8-10  | +<br>2 |
| 65-74 | +<br>5 | 70-109mmHg  | 0      | 70-109bpm  | 0      | 12-24bpm         | 0      | >89%   | 0      | 11-13 | +<br>1 |
| >74   | +<br>6 | 50-69mmHg   | +<br>2 | 55-69bpm   | +<br>2 | 10-11bpm         | +<br>1 |        |        | >13   | 0      |
|       |        | ≤49mmHg     | +<br>4 | 40-54bpm   | +<br>3 | 6-9bpm           | +<br>2 |        |        |       |        |
|       |        |             |        | ≤39bpm     | +<br>4 | ≤5bpm            | +<br>4 |        |        |       |        |

## Interpretation:

| REMS  | In-hospital mortality |
|-------|-----------------------|
| 0-2   | 0%                    |
| 3-5   | 1%                    |
| 6-9   | 3%                    |
| 10-11 | 4%                    |
| 12-13 | 10%                   |
| 14-15 | 17%                   |
| 16-17 | 38%                   |
| 18-19 | 75%                   |
| 20-21 | 56%                   |
| 22-23 | 66%                   |
| 24-26 | 100%                  |

# qSOFA

| Altered mental status <sup>[LSEP]</sup> |        | Respiratory rate $\geq 22$ |        | Systolic blood pressure $\leq 100$ |        |
|-----------------------------------------|--------|----------------------------|--------|------------------------------------|--------|
| NO                                      | 0      | NO                         | 0      | NO                                 | 0      |
| YES                                     | +<br>1 | YES                        | +<br>1 | YES                                | +<br>1 |

Score 0-1 : Not high risk for in-hospital mortality

Score 2-3: High risk for in-hospital mortality (3- to 14-fold increase)
